# Supplementary material for: Evidence for a recombinant origin of HIV-1 Group M from genomic variation
Source: PubMed Central journal article supplement (PMC6342232; doi:10.1093/ve/vey039), 2019-01-22

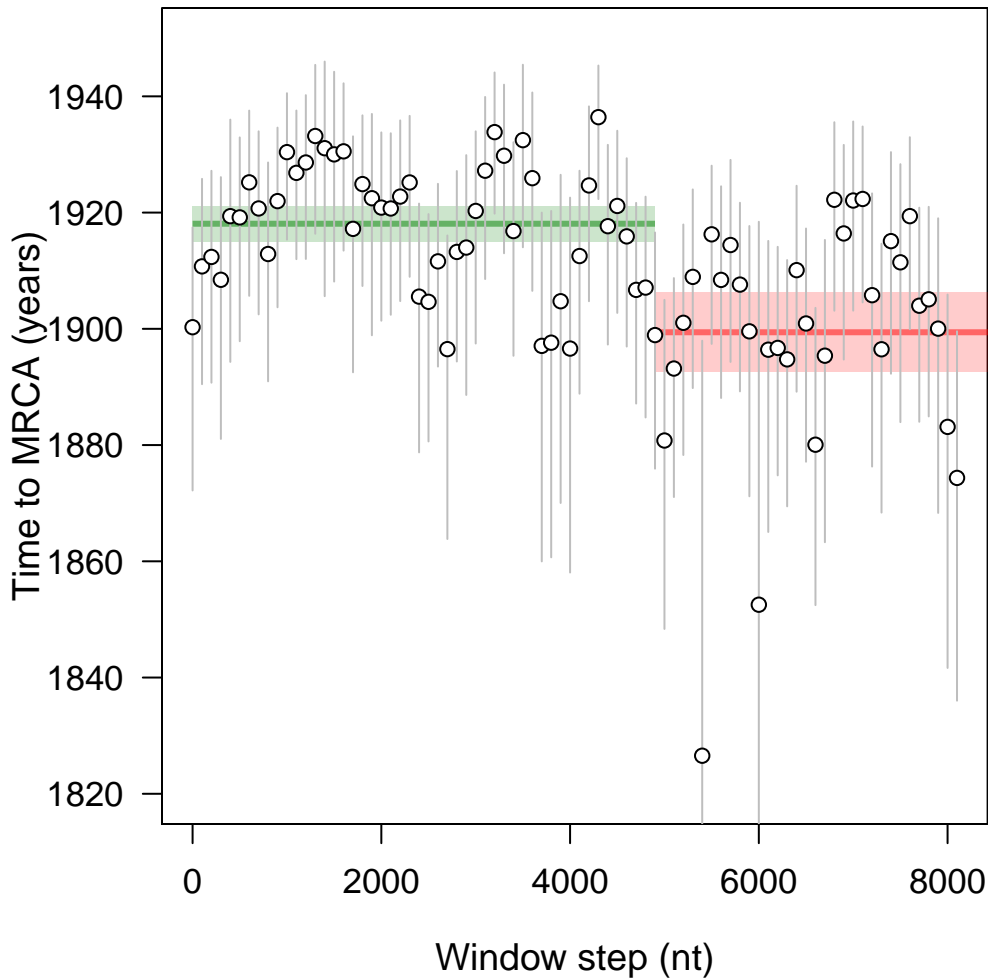

Supplement: vey039_figure_s4.pdf [file vey039_figure_s4.pdf]
